# Supplementary material for: Extra-Virgin Olive Oil Enhances the Blood–Brain Barrier Function in Mild Cognitive Impairment: A Randomized Controlled Trial
Source: MDPI journal article supplement (doi:10.3390/nu14235102), 2022-12-01
Supplement: s1 [file s1]

**Extra-virgin olive oil enhances the blood-brain barrier function in mild cognitive impairment: a randomized controlled trial**

Amal Kaddoumi<sup>1,2\*</sup>, Thomas S. Denney Jr.<sup>2,3</sup>, Gopikrishna Deshpande<sup>2-9</sup>, Jennifer L. Robinson<sup>2,3,4</sup>, Ronald J. Beyers<sup>3</sup>, David T. Redden<sup>10</sup>, Domenico Pratico<sup>11</sup>, Tassos C. Kyriakides<sup>12</sup>, Bonian Lu<sup>3</sup>, Anna N. Kirby<sup>13</sup>, Darren T. Beck<sup>14</sup>, Nancy D. Merner<sup>15</sup>

<sup>1</sup> Department of Drug Discovery and Development, Harrison College of Pharmacy, Auburn University. Auburn, AL, USA

<sup>2</sup> Center for Neuroscience, Auburn University, Auburn, AL, USA.

<sup>3</sup> Auburn University MRI Research Center, Department of Electrical & Computer Engineering, Auburn University, Auburn, AL, USA

<sup>4</sup> Department of Psychological Sciences, Auburn University, Auburn, AL, USA.

<sup>5</sup> Alabama Advanced Imaging Consortium, Birmingham, AL, USA.

<sup>6</sup> Key Laboratory for Learning and Cognition, School of Psychology, Capital Normal University, Beijing, China.

<sup>7</sup> Department of Psychiatry, National Institute of Mental Health and Neurosciences, Bangalore, India.

<sup>8</sup> Centre for Brain Research, Indian Institute of Science, Bangalore, India.

<sup>9</sup> Department of Heritage Science and Technology, Indian Institute of Technology, Hyderabad, India.

<sup>10</sup> Biomedical Affairs and Research, Edward Via College of Osteopathic Medicine, Auburn University. Auburn, AL, USA

<sup>11</sup> Alzheimer's Center at Temple, Lewis Katz School of Medicine Temple University, Philadelphia, PA, USA

<sup>12</sup> Yale School of Public Health, New Haven, CT, USA

<sup>13</sup> Department of Cell Biology and Physiology and Preventive Medicine and Public Health, Edward Via College of Osteopathic Medicine, Auburn University. Auburn, AL, USA

<sup>14</sup> Department of Cell Biology and Physiology, Via College of Osteopathic Medicine, Auburn University. Auburn, AL, USA

<sup>15</sup> Department of Pathobiology, College of Veterinary Medicine, Auburn University. Auburn, AL, USA

\* Correspondence

Amal Kaddoumi, Department of Drug Discovery & Development, Harrison College of Pharmacy, Auburn University, 720 S. Donahue Dr., Auburn, AL 36849.

Email: [kaddoumi@auburn.edu](mailto:kaddoumi@auburn.edu)

**Table S1.** ROO 6 months > baseline task-rest differences.

| z    | x      | y      | z     | Lobe      | Region                         | BA |  |
|------|--------|--------|-------|-----------|--------------------------------|----|--|
| 3.09 | -50.77 | 10.85  | 24.92 | Frontal   | Left Inferior Frontal Gyrus    | 9  |  |
| 3.02 | -43.23 | 1.42   | 22.54 |           |                                | 44 |  |
| 2.98 | -47.01 | 4.89   | 28.17 |           |                                |    |  |
| 3.07 | -54.55 | 10.99  | 23.09 |           | Left Medial Frontal Gyrus      | 6  |  |
| 2.94 | -45.11 | 1.66   | 18.93 |           |                                | 6  |  |
| 3.30 | 0.23   | 1.07   | 51.74 |           | Left Middle Frontal Gyrus      |    |  |
| 3.34 | -31.93 | 7.04   | 51.93 |           |                                |    |  |
| 3.30 | -28.10 | 13.05  | 46.91 |           |                                |    |  |
| 3.01 | -26.23 | 14.35  | 56.06 |           |                                |    |  |
| 2.99 | -26.23 | 7.34   | 46.55 |           |                                |    |  |
| 2.58 | -24.36 | 5.20   | 50.05 |           |                                |    |  |
| 2.55 | -24.35 | 1.75   | 44.39 |           |                                |    |  |
| 3.20 | -37.46 | 27.79  | 26.10 |           | 9                              |    |  |
| 3.73 | -39.30 | 39.41  | 23.23 |           | 10                             |    |  |
| 3.14 | -35.50 | 39.73  | 17.84 |           |                                |    |  |
| 2.64 | -26.02 | 39.88  | 14.29 |           |                                |    |  |
| 2.51 | -31.72 | 43.14  | 23.52 |           |                                |    |  |
| 2.49 | -27.93 | 43.11  | 23.54 |           |                                |    |  |
| 3.37 | 0.24   | 4.87   | 51.99 |           | Left Superior Frontal Gyrus    | 6  |  |
| 3.13 | 34.58  | 33.04  | -5.69 |           | Right Inferior Frontal Gyrus   | 47 |  |
| 2.37 | 30.77  | 30.83  | -0.42 |           |                                |    |  |
| 2.87 | 40.27  | 43.90  | 2.30  |           | Right Medial Frontal Gyrus     | 6  |  |
| 3.46 | 2.19   | 14.79  | 45.41 |           |                                | 9  |  |
| 3.41 | 36.43  | 46.10  | 27.75 |           | Right Middle Frontal Gyrus     |    |  |
| 3.06 | 36.44  | 46.33  | 24.14 |           |                                |    |  |
| 2.98 | 36.42  | 40.65  | 23.77 |           |                                |    |  |
| 2.98 | 40.24  | 46.53  | 20.56 |           |                                |    |  |
| 3.05 | 40.26  | 47.00  | 13.35 |           |                                |    |  |
| 3.04 | 40.27  | 50.79  | 13.60 |           |                                |    |  |
| 3.02 | 34.59  | 43.84  | 4.07  |           |                                |    |  |
| 2.77 | 30.79  | 43.52  | 9.45  |           |                                |    |  |
| 2.76 | 28.92  | 49.34  | 8.01  |           |                                |    |  |
| 2.90 | 32.59  | 34.41  | 32.39 |           | Right Superior Frontal Gyrus   | 9  |  |
| 3.29 | 34.57  | 50.26  | 22.58 |           |                                | 10 |  |
| 2.95 | -3.48  | 9.73   | 35.99 | Limbic    | Left Cingulate Gyrus           | 24 |  |
| 3.38 | -1.60  | 9.49   | 39.61 |           |                                | 32 |  |
| 2.87 | -11.06 | 9.68   | 37.75 |           |                                |    |  |
| 3.18 | 26.53  | -76.93 | 17.87 | Occipital | Right Cuneus                   | 18 |  |
| 4.01 | 30.29  | -75.76 | 28.83 |           |                                | 19 |  |
| 3.60 | 30.27  | -81.33 | 26.66 |           | Right Middle Occipital Gyrus   | 19 |  |
| 4.16 | 30.30  | -75.53 | 25.23 |           |                                |    |  |
| 3.35 | -35.91 | -58.35 | 33.17 | Parietal  | Left Angular Gyrus             | 39 |  |
| 3.06 | -32.11 | -52.81 | 35.37 |           | Left Inferior Parietal Lobule  | 40 |  |
| 3.04 | -56.65 | -35.53 | 36.34 |           |                                |    |  |
| 3.17 | -43.40 | -37.31 | 32.69 |           | Left Supramarginal Gyrus       | 40 |  |
| 3.11 | -37.77 | -48.85 | 33.78 |           |                                |    |  |
| 3.23 | 49.36  | -30.89 | 39.10 |           | Right Inferior Parietal Lobule | 40 |  |
| 3.19 | 51.20  | -40.73 | 43.90 |           |                                |    |  |
| 3.10 | 47.44  | -35.01 | 44.25 |           |                                |    |  |
| 3.06 | 41.74  | -38.87 | 45.78 |           | Right Postcentral Gyrus        | 2  |  |
| 3.22 | 49.36  | -29.23 | 42.83 |           |                                | 7  |  |
| 2.85 | 28.41  | -64.95 | 38.57 |           | Right Precuneus                | 19 |  |
| 3.35 | 32.19  | -72.22 | 32.69 |           |                                |    |  |
| 3.12 | -33.69 | 8.30   | 3.14  | Sub-lobar | Left Claustrum                 |    |  |
| 2.92 | -27.94 | 25.42  | 2.48  |           |                                |    |  |
| 3.59 | -31.76 | 19.54  | 5.69  |           | Left Insula                    | 13 |  |
| 3.15 | -39.34 | 12.37  | -0.25 |           |                                |    |  |
| 3.67 | 28.84  | 23.15  | 0.87  |           | Right Claustrum                |    |  |
| 3.64 | 28.84  | 17.81  | -4.90 |           |                                |    |  |
| 3.54 | 36.37  | 15.15  | 5.83  |           | Right Insula                   | 13 |  |
| 2.65 | 40.16  | 11.67  | 0.20  |           |                                |    |  |
| 3.54 | -32.12 | -60.16 | 31.27 | Temporal  | Left Middle Temporal Gyrus     | 39 |  |

**Table S2.** EVOO group baseline > 6-month task-rest differences.

| <b>z</b> | <b>x</b> | <b>y</b> | <b>z</b> | <b>Lobe</b> | <b>Region</b>             | <b>BA</b> |
|----------|----------|----------|----------|-------------|---------------------------|-----------|
| 3.12     | -37.58   | 9.34     | 46.61    | Frontal     | Left Middle Frontal Gyrus | 6         |
| 2.83     | -33.81   | 3.85     | 42.66    |             |                           | 9         |
| 3.15     | -43.23   | 8.30     | 33.85    |             |                           |           |
| 2.83     | -47.00   | 12.13    | 34.07    |             | Left Precentral Gyrus     | 6         |
| 2.98     | -37.58   | 2.45     | 35.31    |             |                           |           |
| 2.84     | -33.79   | 0.75     | 31.60    |             |                           |           |

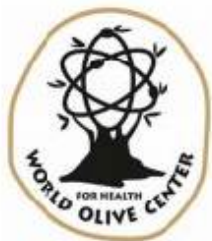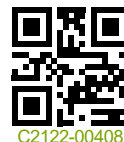

C2122-00408

**World Olive Center for Health**

76 Imittou St. 5th floor  
11634, Pagkrati, Athens  
Tel: 2107010131  
info@worldolivecenter.com

Athens: 30/11/2021  
Cert. Num: C2122-00408

**CERTIFICATE OF ANALYSIS**

**Brand Name:** The Governor Limited Edition  
**Owner:** G DAFNIS AND S DAFNIS SA  
**Variety:** LIANOLIA  
**Origin:** AGIOS MATTHAIOS KERKYRA GREECE  
**Harvesting Period:** October 2021  
**Oil Press:** G DAFNIS AND S DAFNIS SA

**Analysis Date:** 09/11/2021

**Chemical Analysis**

|                                         |       |       |
|-----------------------------------------|-------|-------|
| Oleocanthal                             | 621   | mg/Kg |
| Oleacein                                | 344   | mg/Kg |
| Oleocanthal+Oleacein (index D1)         | 965   | mg/Kg |
| Ligstroside aglycon (monoaldehyde form) | 44    | mg/Kg |
| Oleuropein aglycon (monoaldehyde form)  | 41    | mg/Kg |
| Ligstroside aglycon (dialdehyde form)*  | 97    | mg/Kg |
| Oleuropein aglycon (dialdehyde form)**  | 34    | mg/Kg |
| Free Tyrosol                            | 20    | mg/Kg |
| Total tyrosol derivatives               | 782   | mg/Kg |
| Totalhydroxytyrosol derivatives         | 419   | mg/Kg |
| Total polyphenols analyzed              | 1.201 | mg/Kg |

**Comments:**

The chemical analysis was performed according to the method that has been submitted to EFET and published in J Agric Food Chem, 2012, 60,11696, J Agric Food Chem, 2014,62, 600-607 & Molecules, 2020, 25, 2449. \*Oleomissional+Oleuropeindial  
\*\*Ligstrodiol+Oleokoronol

Magiatis Prokopios

**PROKOPIOS MAGIATIS**  
ASSOCIATE PROFESSOR  
UNIVERSITY OF ATHENS  
FACULTY OF PHARMACY  
DEPARTMENT OF PHARMACOGNOSY  
AND NATURAL PRODUCTS CHEMISTRY
